# Supplementary material for: MOF-derived carbon coated Cu3P with Ni doping as advanced supercapacitor electrode materials
Source: Royal Society of Chemistry journal article supplement (doi:10.1039/d2se01024k), 2022-01-01
Supplement: d2se01024k1.pdf [file d2se01024k1.pdf]

## Supplementary Material

### MOFs-derived carbon coated Cu<sub>3</sub>P with Ni doping as advanced supercapacitor electrode materials

Xuan He<sup>a</sup>, Yuhong Jin<sup>b\*</sup>, Miao Jia<sup>c</sup>, Mengqiu Jia<sup>a\*</sup>, Hao Wang<sup>b</sup>, Muhammad Imran<sup>d</sup>

<sup>a</sup>Beijing Key Laboratory of Electrochemical Process and Technology for Materials,  
Beijing University of Chemical Technology, Beijing 100029, China

<sup>b</sup>Key Laboratory for New Functional Materials of Ministry of Education, Institution of  
Advanced Energy Materials and Devices, Faculty of Materials and Manufacturing,  
Beijing University of Technology, Beijing 100124, PR China

<sup>c</sup>College of Chemistry and Materials Engineering, Beijing Technology and Business  
University, Beijing 100048, P. R. China.

<sup>d</sup>Department of Chemistry, Faculty of Science, King Khalid University, PO Box 9004,  
Abha, 61413, Saudi Arabia

Fig. S1. XRD patterns of Cu-MOF.

Fig. S2. XRD patterns of Cu@C.

Fig. S3. XRD of Cu<sub>3</sub>P/C-5%Ni, Cu<sub>3</sub>P/C-10%Ni and Cu<sub>3</sub>P/C-15%Ni.

Fig. S4. SEM image of Cu<sub>3</sub>P/C-6%Ni at high magnification.

Fig. S5. SEM images of (a) Cu-MOF-3%Ni; (b) Cu-MOF-4%Ni; (c) Cu-MOF-5%Ni; (d) Cu-MOF-6%Ni; (e) Cu-MOF-10%Ni; (f) Cu-MOF-15%Ni.

Fig. S6. SEM images of (a) Cu/C; (b) Cu/C-3%Ni; (c) Cu/C-4%Ni; (d) Cu/C-5%Ni; (e) Cu/C-6%Ni; (f) Cu/C-10%Ni; (g) Cu/C-15%Ni.

Fig. S7. SEM images of (a) Cu<sub>3</sub>P/C-3%Ni; (b) Cu<sub>3</sub>P/C-4%Ni; (c) Cu<sub>3</sub>P/C-5%Ni; (d) Cu<sub>3</sub>P/C-10%Ni; (e) Cu<sub>3</sub>P/C-15%Ni.

Fig. S8. SEM images of the product by direct phosphorization of Cu-MOF.

Fig. S9. EDS mapping of Cu, P, N and C elements for Cu<sub>3</sub>P/C.

Fig. S10. CV curves of (a) Cu<sub>3</sub>P/C; (b) Cu<sub>3</sub>P/C-3%Ni; (c) Cu<sub>3</sub>P/C-4%Ni; (d) Cu<sub>3</sub>P/C-5%Ni; (e) Cu<sub>3</sub>P/C-10%Ni and (f) Cu<sub>3</sub>P/C-15%Ni electrode at different scan rates.

Table S1. Specific capacitances of the Cu<sub>3</sub>P-based electrodes at different scan rates.

Fig. S11. GCD curves of (a) Cu<sub>3</sub>P/C; (b) Cu<sub>3</sub>P/C-3%Ni; (c) Cu<sub>3</sub>P/C-4%Ni; (d) Cu<sub>3</sub>P/C-5%Ni; (e) Cu<sub>3</sub>P/C-10%Ni and (f) Cu<sub>3</sub>P/C-15%Ni electrode at different current densities.

Table S2. Specific discharge capacitance of Cu<sub>3</sub>P-based electrodes.

Fig. S12. EIS plots of Cu<sub>3</sub>P-based-samples.

Fig. S13. EIS plots of initial and after 10000 cycles, inset shows the equivalent circuit and enlarged section.

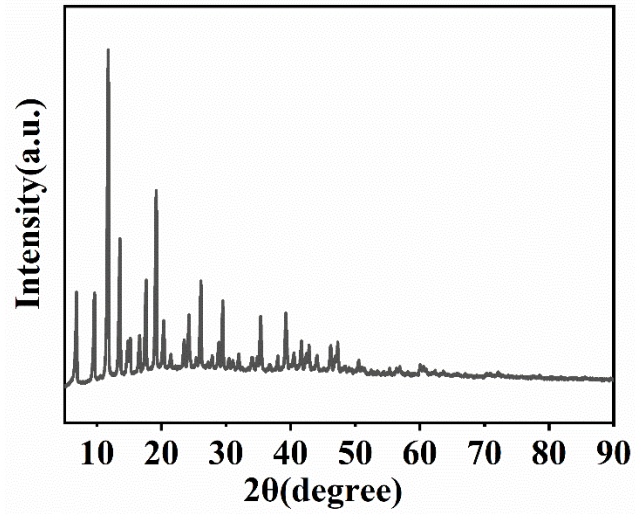

Fig. S1. XRD patterns of Cu-MOF.

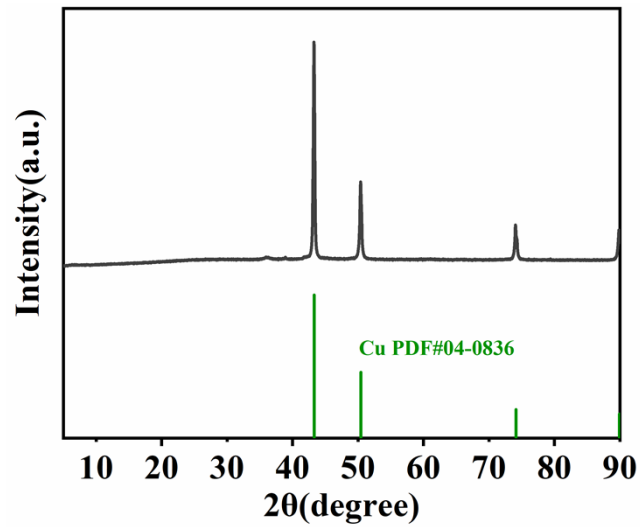

Fig. S2. XRD patterns of Cu@C.

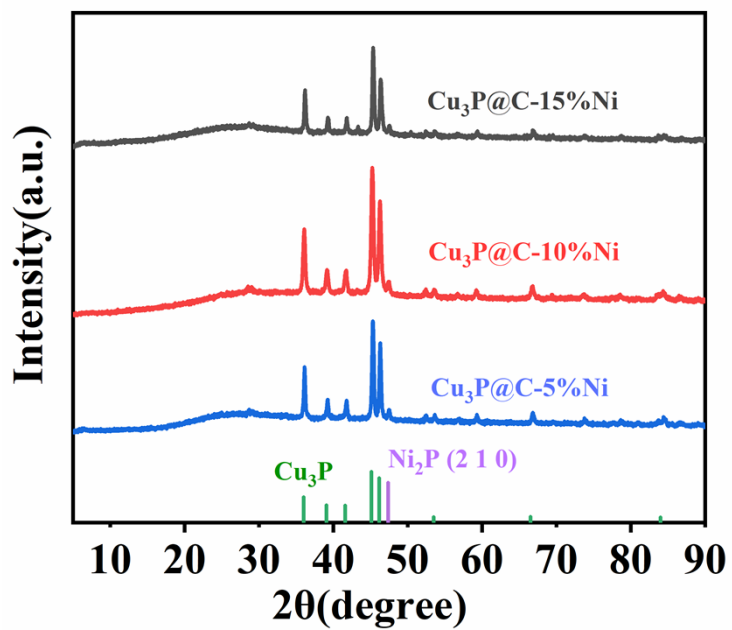

Fig. S3. XRD of  $\text{Cu}_3\text{P}/\text{C}$ -5%Ni,  $\text{Cu}_3\text{P}/\text{C}$ -10%Ni and  $\text{Cu}_3\text{P}/\text{C}$ -15%Ni

The samples doped with Ni show the diffraction peak of  $\text{Ni}_2\text{P}$  corresponding to the crystal plane.

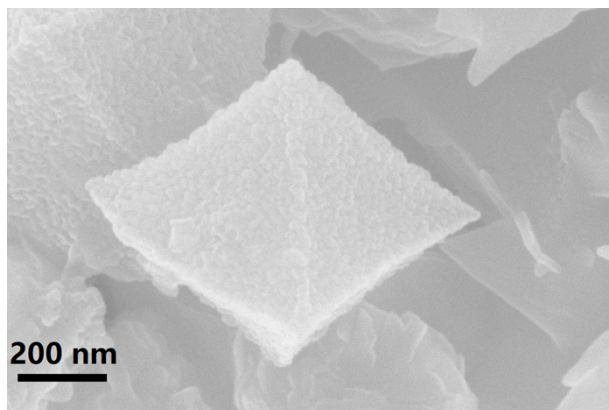

Fig. S4. SEM image of  $\text{Cu}_3\text{P}/\text{C}$ -6%Ni at high magnification.

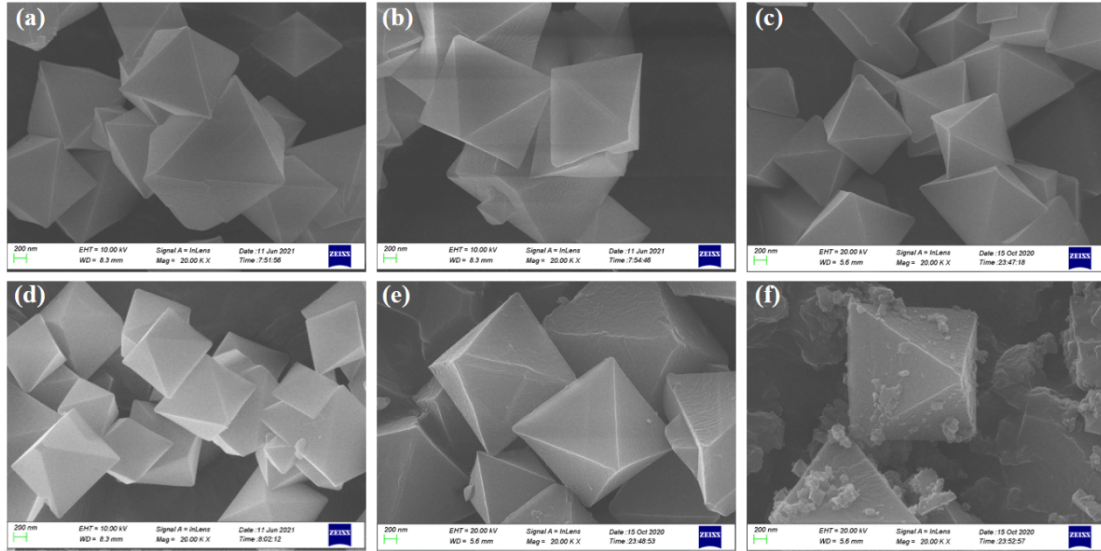

Fig. S5. SEM images of (a) Cu-MOF-3%Ni; (b) Cu-MOF-4%Ni; (c) Cu-MOF-5%Ni; (d) Cu-MOF-6%Ni; (e) Cu-MOF-10%Ni; (f) Cu-MOF-15%Ni.

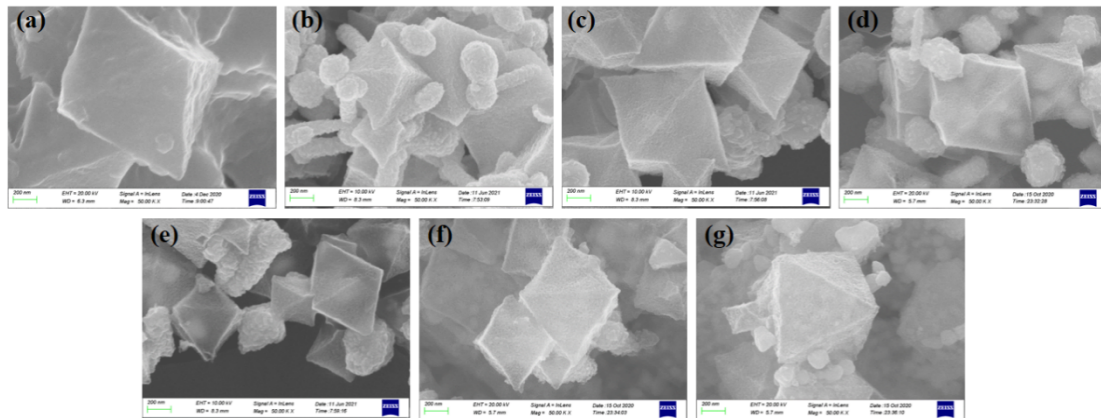

Fig. S6. SEM images of (a) Cu/C; (b) Cu<sub>3</sub>P/C-3% Ni; (c) Cu<sub>3</sub>P/C-4% Ni; (d) Cu<sub>3</sub>P/C-5%Ni; (e) Cu<sub>3</sub>P/C-6%Ni; (f) Cu<sub>3</sub>P/C-10% Ni; (g) Cu<sub>3</sub>P/C-15% Ni.

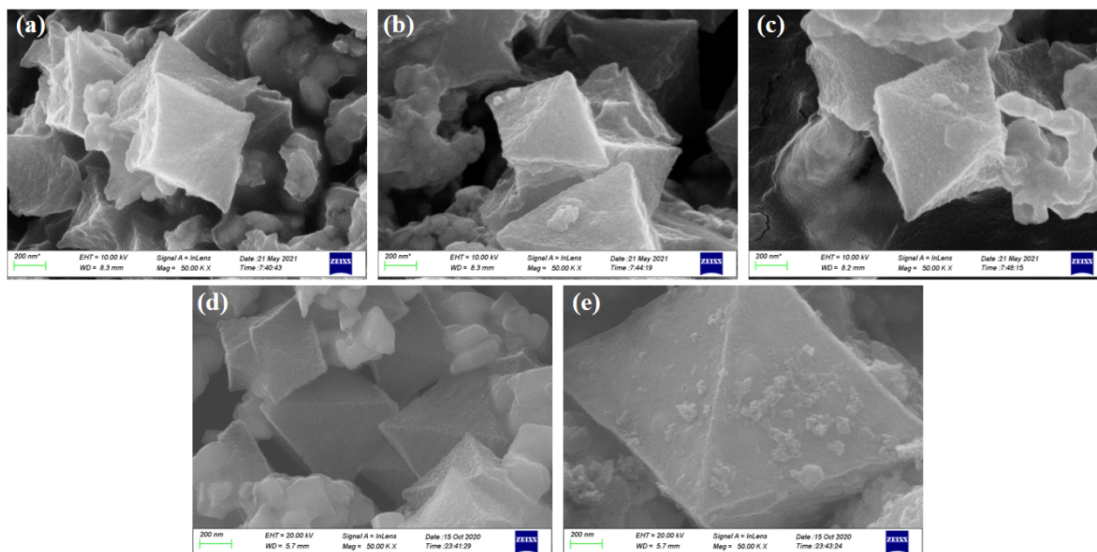

Fig. S7. SEM images of (a)  $\text{Cu}_3\text{P}/\text{C}$ -3% Ni; (b)  $\text{Cu}_3\text{P}/\text{C}$ -4% Ni; (c)  $\text{Cu}_3\text{P}/\text{C}$ -5% Ni; (d)  $\text{Cu}_3\text{P}/\text{C}$ -10% Ni; (e)  $\text{Cu}_3\text{P}/\text{C}$ -15% Ni.

The Cu-MOF-based precursors all showed smooth surfaces, while nanoparticles gathered on the surfaces after carbonization and phosphorization.

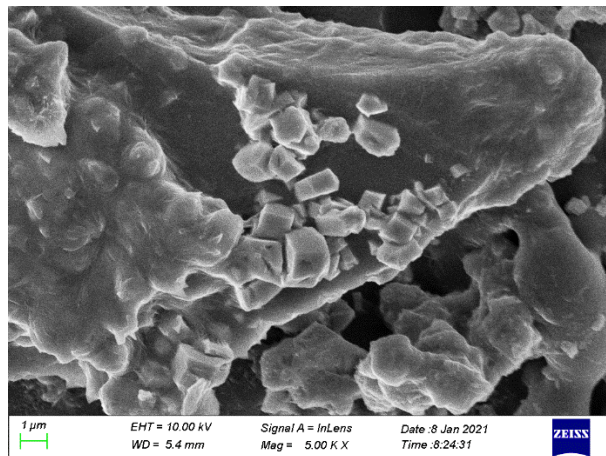

Fig. S8. SEM images of the product by direct phosphorization of Cu-MOF.

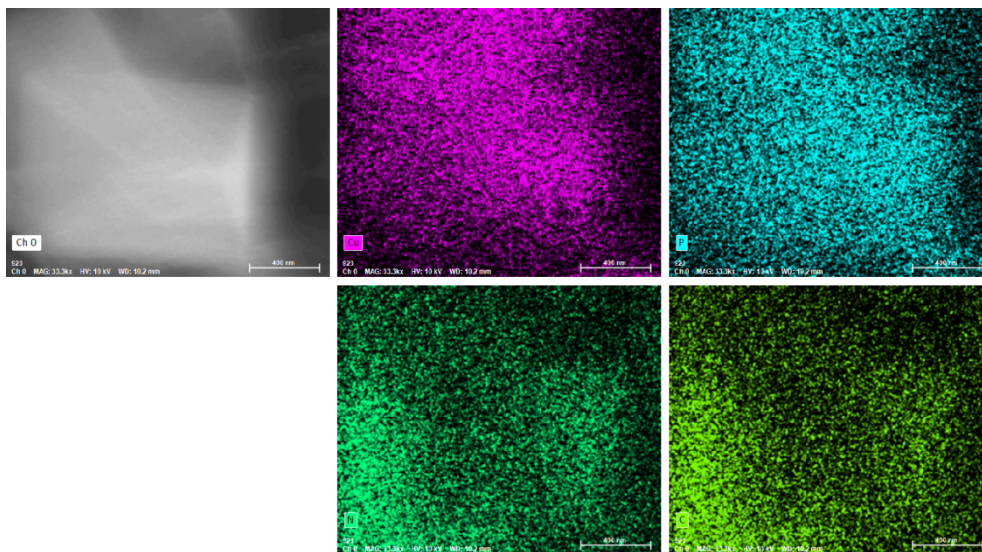

Fig. S9. EDS mapping of Cu, P, N and C elements for Cu<sub>3</sub>P/C.

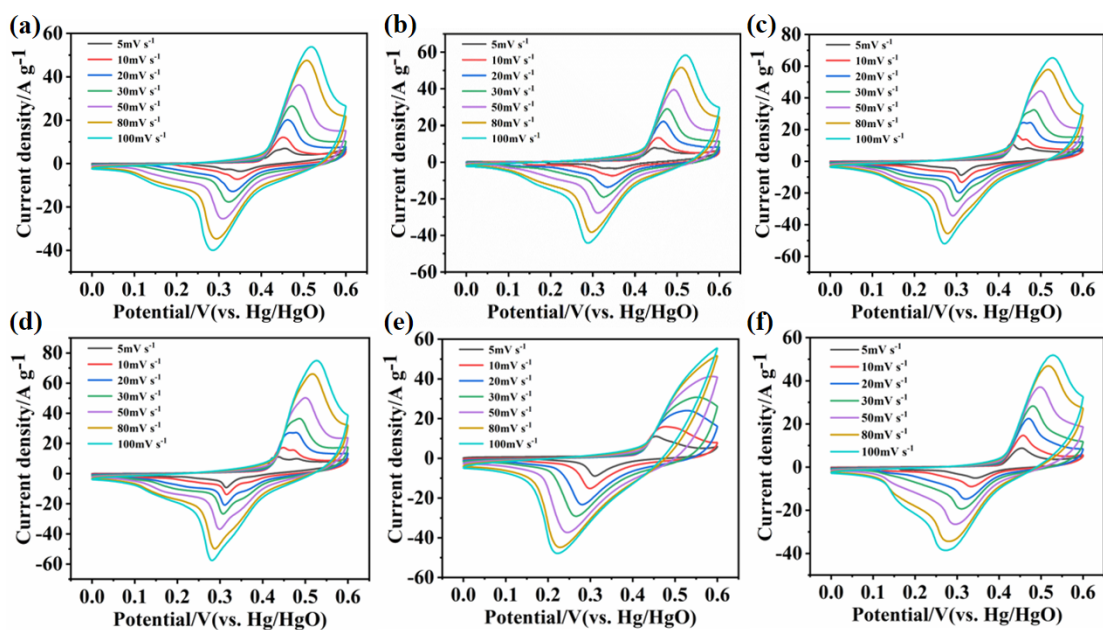

Fig. S10. CV curves of (a)  $\text{Cu}_3\text{P}/\text{C}$ ; (b)  $\text{Cu}_3\text{P}/\text{C}$ -3% Ni; (c)  $\text{Cu}_3\text{P}/\text{C}$ -4%; (d)  $\text{Cu}_3\text{P}/\text{C}$ -5%; (e)  $\text{Cu}_3\text{P}/\text{C}$ -10% and (f)  $\text{Cu}_3\text{P}/\text{C}$ -15% electrode at different scan rates.

Table S1. Specific capacitances of the  $\text{Cu}_3\text{P}$ -based electrodes at different scan rates.

| Specific capacitance ( $\text{C g}^{-1}$ ) | 5 $\text{mV s}^{-1}$ | 10 $\text{mV s}^{-1}$ | 20 $\text{mV s}^{-1}$ | 30 $\text{mV s}^{-1}$ | 50 $\text{mV s}^{-1}$ | 80 $\text{mV s}^{-1}$ | 100 $\text{mV s}^{-1}$ |
|--------------------------------------------|----------------------|-----------------------|-----------------------|-----------------------|-----------------------|-----------------------|------------------------|
| $\text{Cu}_3\text{P}/\text{C}$             | 353.6                | 235.3                 | 204.1                 | 191.5                 | 173.6                 | 155.3                 | 131.2                  |
| $\text{Cu}_3\text{P}/\text{C}$ -3% Ni      | 394.0                | 267.0                 | 227.7                 | 210.0                 | 188.8                 | 168.0                 | 157.9                  |
| $\text{Cu}_3\text{P}/\text{C}$ -4% Ni      | 562.6                | 397.0                 | 320.0                 | 279.5                 | 235.0                 | 200.0                 | 184.9                  |
| $\text{Cu}_3\text{P}/\text{C}$ -5% Ni      | 694.0                | 441.4                 | 347.5                 | 303.8                 | 257.5                 | 220.6                 | 204.8                  |
| $\text{Cu}_3\text{P}/\text{C}$ -6% Ni      | 700.0                | 561.0                 | 465.0                 | 410.6                 | 346.0                 | 291.9                 | 264.8                  |
| $\text{Cu}_3\text{P}/\text{C}$ -10% Ni     | 534.0                | 437.2                 | 368.9                 | 328.6                 | 272.2                 | 215.4                 | 188.0                  |
| $\text{Cu}_3\text{P}/\text{C}$ -15% Ni     | 382.3                | 304.0                 | 255.7                 | 231.8                 | 202.5                 | 173.5                 | 158.1                  |



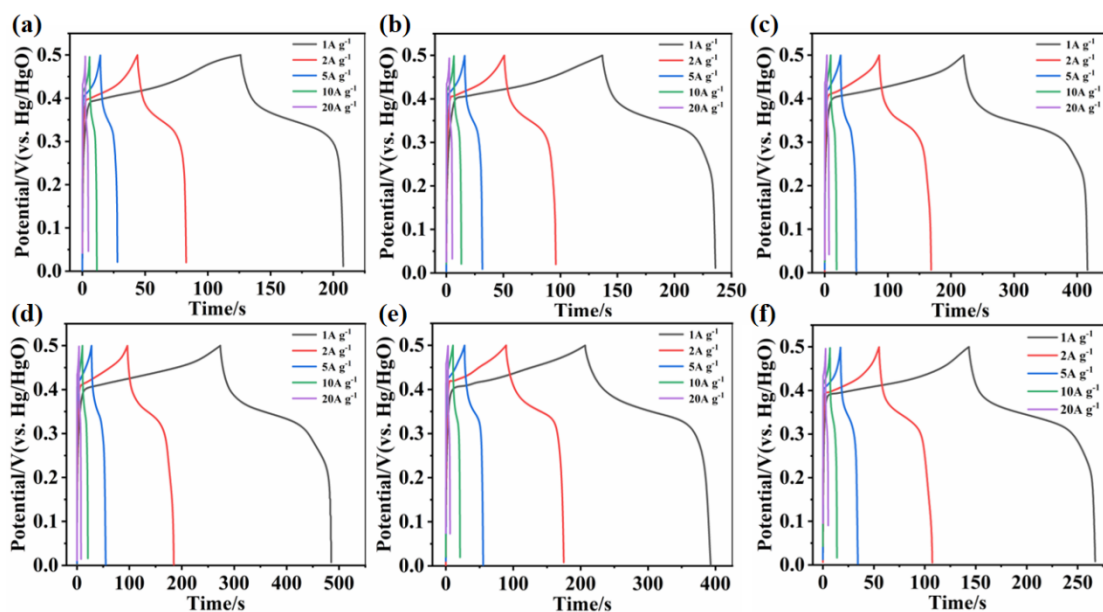

Fig. S11. GCD curves of (a)  $\text{Cu}_3\text{P}/\text{C}$ ; (b)  $\text{Cu}_3\text{P}/\text{C}$ -3% Ni; (c)  $\text{Cu}_3\text{P}/\text{C}$ -4%; (d)  $\text{Cu}_3\text{P}/\text{C}$ -5%; (e)  $\text{Cu}_3\text{P}/\text{C}$ -10% and (f)  $\text{Cu}_3\text{P}/\text{C}$ -15% electrode at different current densities.

Table S2. Specific discharge capacitance of  $\text{Cu}_3\text{P}$ -based electrodes.

| Specific capacitance ( $\text{C g}^{-1}$ ) | $1 \text{ A g}^{-1}$ | $2 \text{ A g}^{-1}$ | $5 \text{ A g}^{-1}$ | $10 \text{ A g}^{-1}$ | $20 \text{ A g}^{-1}$ |
|--------------------------------------------|----------------------|----------------------|----------------------|-----------------------|-----------------------|
| $\text{Cu}_3\text{P}/\text{C}$             | 81.8                 | 77.6                 | 68.5                 | 58                    | 48                    |
| $\text{Cu}_3\text{P}/\text{C}$ -3% Ni      | 99.1                 | 90.4                 | 77.5                 | 65                    | 52                    |
| $\text{Cu}_3\text{P}/\text{C}$ -4% Ni      | 196                  | 164.8                | 124.5                | 94                    | 68                    |
| $\text{Cu}_3\text{P}/\text{C}$ -5% Ni      | 211.7                | 177                  | 135.5                | 104                   | 78                    |
| $\text{Cu}_3\text{P}/\text{C}$ -6% Ni      | 283.8                | 232.2                | 173.5                | 134                   | 98                    |
| $\text{Cu}_3\text{P}/\text{C}$ -10% Ni     | 186.2                | 171                  | 138                  | 105                   | 62                    |
| $\text{Cu}_3\text{P}/\text{C}$ -15% Ni     | 123.9                | 104.8                | 85                   | 69                    | 52                    |

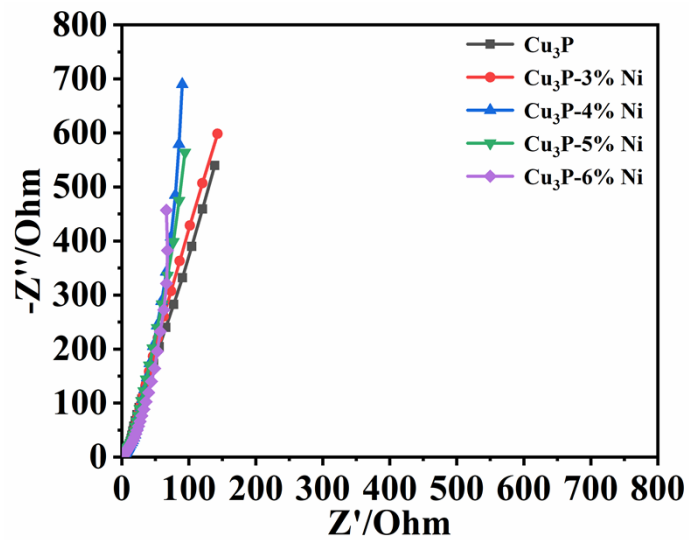

Fig. S12. EIS plots of Cu<sub>3</sub>P-based-samples.

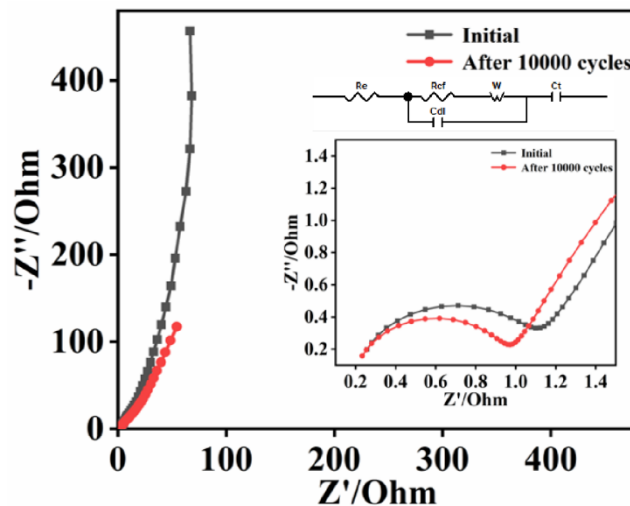

Fig. S13. EIS plots of initial and after 10000 cycles, inset shows the equivalent circuit and enlarged section.

Reference:

[S1] J. Lin, C. Zeng, X. Lin, C. Xu, C.-Y. Su, CNT-Assembled Octahedron Carbon-Encapsulated Cu<sub>3</sub>P/Cu Heterostructure by In Situ MOF-Derived Engineering for Superior Lithium Storage: Investigations by Experimental Implementation and First-Principles Calculation, *Adv. Sci* 7 (2020)
